# Supplementary material for: Genome-Wide Association Mapping Unravels the Genetic Control of Seed Vigor under Low-Temperature Conditions in Rapeseed (Brassica napus L.)
Source: MDPI journal article supplement (doi:10.3390/plants10030426), 2021-02-24
Supplement: s1 [file s1]

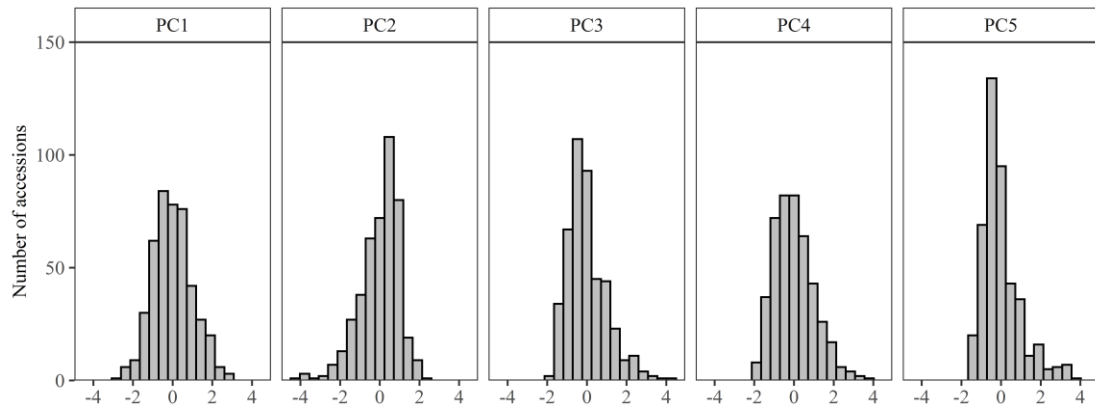

**Supplementary Figure S1.** Frequency distribution of the stress tolerance indices for principal components. PC1 is the comprehensive STI index of RL, TL, SVI and RGR. PC2 is the comprehensive STI index of GI, PG and MGT. PC3 is the comprehensive STI index of DWS, DWR and TDW. PC4 is the comprehensive STI index of GI, PG and MGT. PC5 is the STI index of SL. MGT, mean germination time; GI, germination index; PG, percentage of germination; MET, mean emergence time; PE, percentage of emergence; DWS, dry weight of shoot; DWR, dry weight of root; TDW, total dry weight; RL, root length; SL, shoot length; TL, total length; SVI, seedling vigor index; RGR, root growth rate.

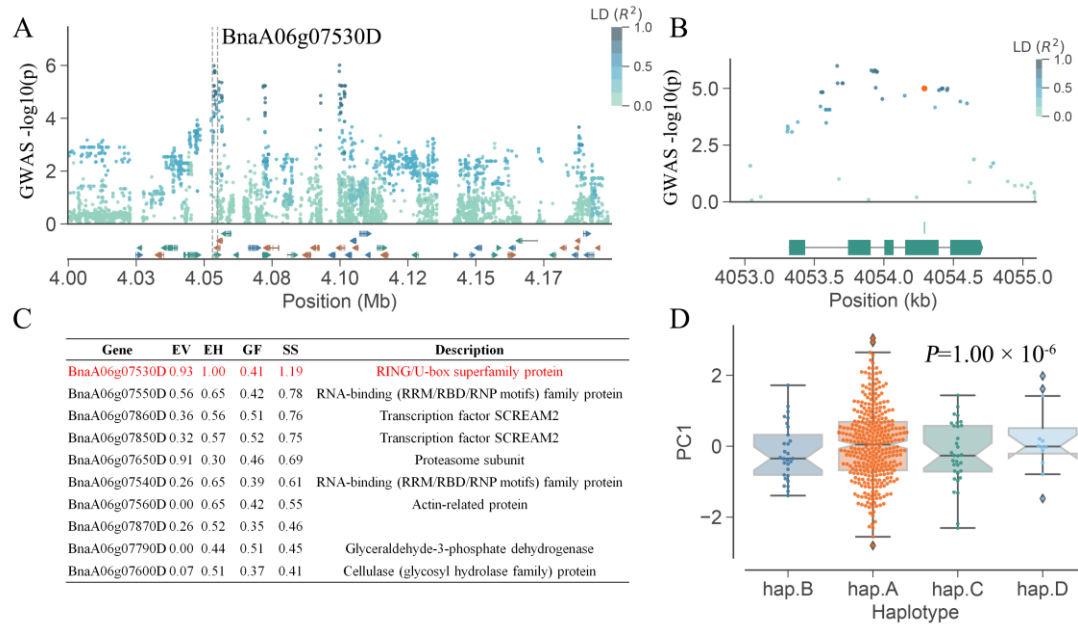

**Supplementary Figure S2.** Prioritization of candidate genes around SNP BnvaA0604099845 based on comprehensive score of GWAS p-value, large effect variation and haplotype variation. (A) Manhattan plot of the SNPs in the 150kbp regions flanking the candidate gene *BnaA06g07530D*, and the window of the dash lines represent the SNPs located in region of the specific gene. (B) GWAS results at the *BnaA06g07530D* gene itself with the high effect SNPs are indicated by gold circles. (C) Ranking the top ten genes according to the summary score and the top-ranked gene is the most likely casual gene. EV, the effect of variations; EH, effect of haplotypes; GF, the score of probability for gene function; SS, summary score of GF, EV, and EH. (D) Box plots displaying the impacts of haplotypes variations derived from the specific gene on the phenotype.

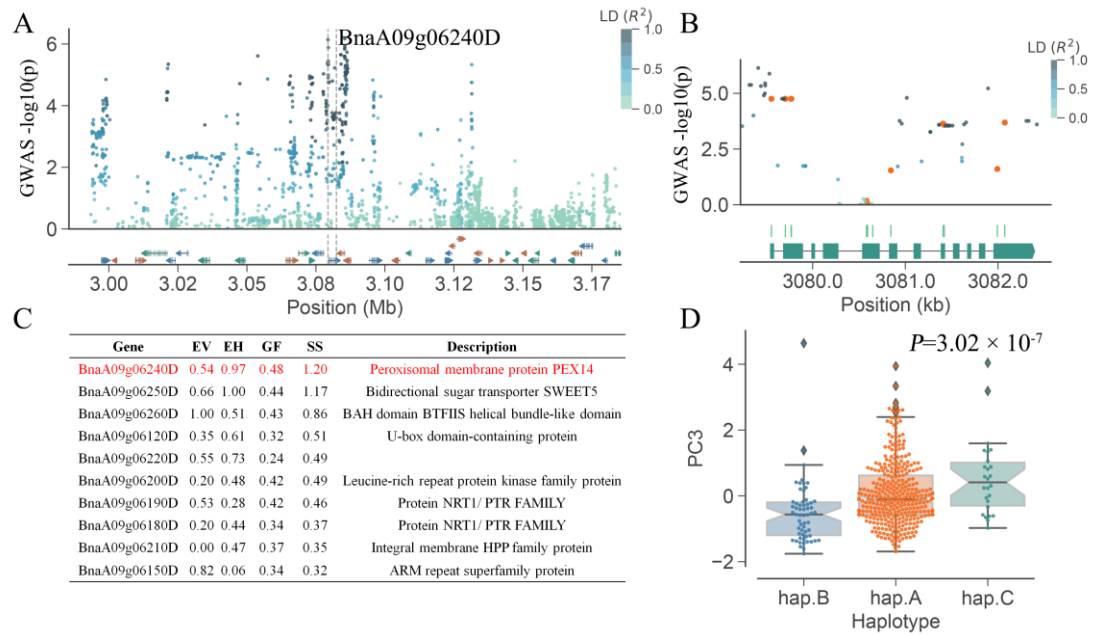

**Supplementary Figure S3.** Prioritization of candidate genes around SNP BnaA0903085508 based on comprehensive score of GWAS p-value, large effect variation and haplotype variation. (A) Manhattan plot of the SNPs in the 150kbp regions flanking the candidate gene *BnaA06g07530D*, and the window of the dash lines represent the SNPs located in region of the specific gene. (B) GWAS results at the *BnaA06g07530D* gene itself with the high effect SNPs are indicated by gold circles. (C) Ranking the top ten genes according to the summary score and the top-ranked gene is the most likely casual gene. EV, the effect of variations; EH, effect of haplotypes; GF, the score of probability for gene function; SS, summary score of GF, EV, and EH. (D) Box plots displaying the impacts of haplotypes variations derived from the specific gene on the phenotype.

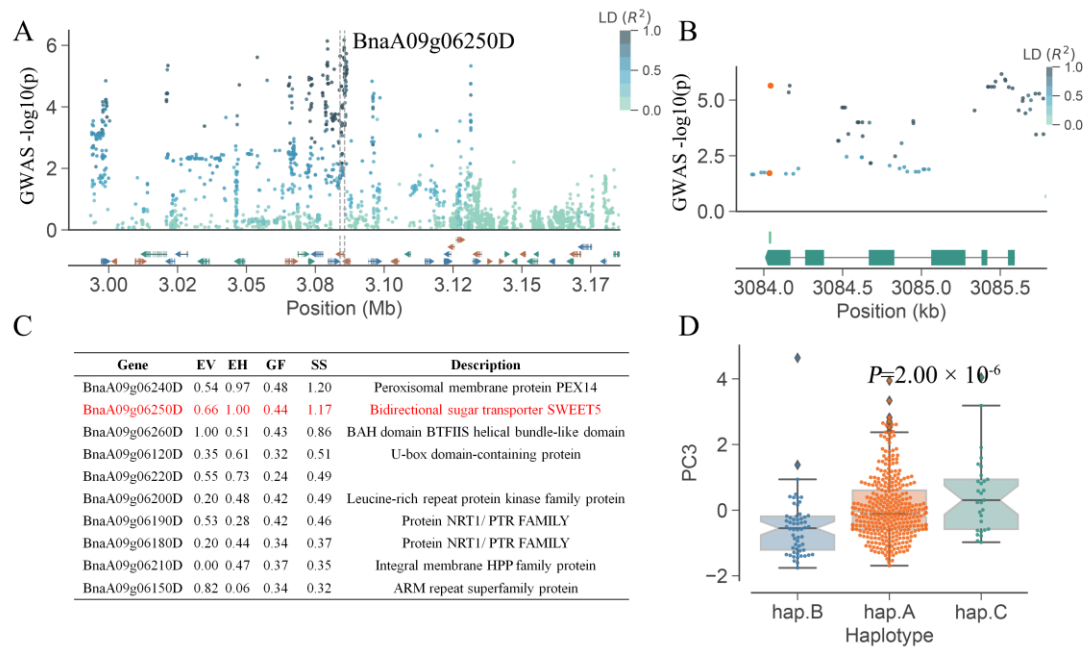

**Supplementary Figure S4.** Prioritization of the candidate genes around SNP BnaA09g06250D based on comprehensive score of GWAS p-value, large effect variation and haplotype variation. (A) Manhattan plot of the SNPs in the 150kbp regions flanking the candidate gene *BnaA09g06250D*, and the window of the dash lines represent the SNPs located in region of the specific gene. (B) GWAS results at the *BnaA09g06250D* gene itself with high effect SNPs are indicated by gold circles. (C) Ranking the top ten genes according to the summary score and the top-ranked gene is the most likely casual gene. EV, the effect of variations; EH, effect of haplotypes; GF, the score of probability for gene function; SS, summary score of GF, EV, and EH. (D) Box plots displaying the impacts of haplotypes variations derived from the specific gene on the phenotype.

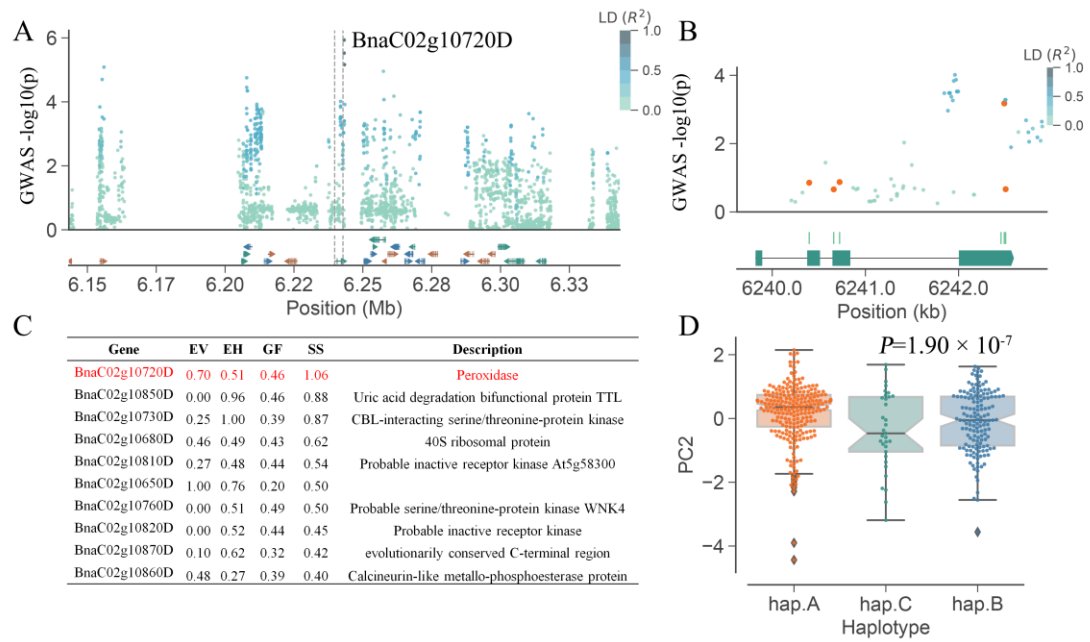

**Supplementary Figure S5.** Prioritization of candidate genes around SNP BnaC02g10720D based on comprehensive score of GWAS p-value, large effect variation and haplotype variation. (A) Manhattan plot of the SNPs in the 150kbp regions flanking the candidate gene *BnaC02g10720D*, and the window of the dash lines represent the SNPs located in region of the specific gene. (B) GWAS results at the *BnaC02g10720D* gene itself with high effect SNPs are indicated by gold circles. (C) Ranking the top ten genes according to the comprehensive scores and the top-ranked gene is the most likely casual gene. EV, the effect of variations; EH, effect of haplotypes; GF, the score of probability for gene function; SS, summary score of GF, EV, and EH. (D) Box plots displaying the impacts of haplotypes variations derived from the specific gene on the phenotype.

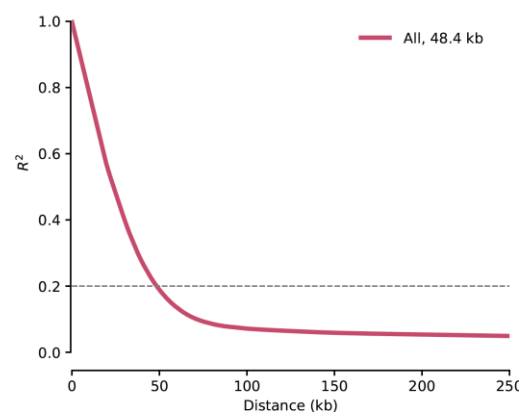

**Supplementary Figure S6.** The Genome-wide linkage disequilibrium (LD) decay in the whole genomes for the 442 accessions. The squared allele frequency ( $r^2$ ) = 0.2 was used as the cut-off.

**Supplementary Table S1.** List of the 442 accessions used for genome wide association study.

| Accessions | Origin           | Type        | Accessions   | Origin            | Type        |
|------------|------------------|-------------|--------------|-------------------|-------------|
| A109       | Shanxi (China)   | Semi-winter | Swu90        | Chongqing (China) | Semi-winter |
| A117       | Shanxi (China)   | Semi-winter | Swu92        | Chongqing (China) | Semi-winter |
| A148       | Sweden           | Spring      | Swu93        | Chongqing (China) | Semi-winter |
| A172       | Shanxi (China)   | Semi-winter | Swu94        | Chongqing (China) | Semi-winter |
| A82        | Jiangxi (China)  | Semi-winter | Swu95        | Chongqing (China) | Semi-winter |
| A97        | Sichuan (China)  | Semi-winter | Swu96        | Chongqing (China) | Semi-winter |
| Agrev019   | German           | Spring      | Swu97        | Chongqing (China) | Semi-winter |
| Agrev021   | German           | Spring      | Swu99        | Chongqing (China) | Semi-winter |
| Aurora     | German           | Spring      | Taisetsu     | Japan             | Vegetable   |
| B265       | Shanxi (China)   | Semi-winter | Tianyou4     | Gansu (China)     | Winter      |
| B285       | Shanxi (China)   | Semi-winter | Wanyou12     | Anhui (China)     | Semi-winter |
| B414       | Xinjiang (China) | Semi-winter | Wanyou15     | Anhui (China)     | Semi-winter |
| Bienvenu   | France           | Winter      | Wanyou16     | Anhui (China)     | Semi-winter |
| Ca-318     | German           | Spring      | Wanyou20     | Anhui (China)     | Semi-winter |
| Canadian2  | Canada           | Spring      | Wanyou29     | Anhui (China)     | Semi-winter |
| Caoyou2    | Shanghai (China) | Semi-winter | Wase Chousen | Japan             | Spring      |
| Ceres      | German           | Winter      | We-241       | Canada            | Spring      |
| Chu107     | Anhui (China)    | Semi-winter | Weilong88    | Hubei (China)     | Semi-winter |
| Chu610     | Anhui (China)    | Semi-winter | Wesreo       | Australia         | Spring      |
| Chuanyou18 | Sichuan (China)  | Semi-winter | Wh-127       | Hubei (China)     | Semi-winter |
| Chuanyou20 | Sichuan (China)  | Semi-winter | Wh-15        | Hubei (China)     | Semi-winter |
| Chuyou1    | Anhui (China)    | Semi-winter | Wh-17        | Hubei (China)     | Semi-winter |
| Cobra      | German           | Winter      | Wh-19        | Hubei (China)     | Semi-winter |

|               |                 |             |       |               |             |
|---------------|-----------------|-------------|-------|---------------|-------------|
| Comet         | Sweden          | Spring      | Wh-20 | Hubei (China) | Semi-winter |
| Conny         | Sweden          | Spring      | Wh-23 | Hubei (China) | Semi-winter |
| Cresor        | France          | Spring      | Wh-24 | Hubei (China) | Semi-winter |
| Cubs Root     | Korea           | Spring      | Wh-26 | Hubei (China) | Semi-winter |
| Cy12Gj-1      | Sichuan (China) | Semi-winter | Wh-29 | Hubei (China) | Semi-winter |
| Cy12Ny-7      | Sichuan (China) | Semi-winter | Wh-30 | Hubei (China) | Semi-winter |
| Cy12Pxx-4     | Sichuan (China) | Semi-winter | Wh-33 | Hubei (China) | Semi-winter |
| Cy12Pxx-6     | Sichuan (China) | Semi-winter | Wh-38 | Hubei (China) | Semi-winter |
| Cy12Pxx-9     | Sichuan (China) | Semi-winter | Wh-42 | Hubei (China) | Semi-winter |
| Cy12Q21535-N3 | Sichuan (China) | Semi-winter | Wh-43 | Hubei (China) | Semi-winter |
| Cy12Q8-7      | Sichuan (China) | Semi-winter | Wh-45 | Hubei (China) | Semi-winter |
| Cy12Q95108    | Sichuan (China) | Semi-winter | Wh-49 | Hubei (China) | Semi-winter |
| Cy12Q95406    | Sichuan (China) | Semi-winter | Wh-50 | Hubei (China) | Semi-winter |
| Cy12Qcwh-1    | Sichuan (China) | Semi-winter | Wh-57 | Hubei (China) | Semi-winter |
| Cy12Qsz06     | Sichuan (China) | Semi-winter | Wh-58 | Hubei (China) | Semi-winter |
| Cy13Pxx-17    | Sichuan (China) | Semi-winter | Wh-59 | Hubei (China) | Semi-winter |
| Cy14Pxx-18    | Sichuan (China) | Semi-winter | Wh-60 | Hubei (China) | Semi-winter |
| Cy15Pxx-31    | Sichuan (China) | Semi-winter | Wh-61 | Hubei (China) | Semi-winter |
| Cy16Pxx-35    | Sichuan (China) | Semi-winter | Wh-62 | Hubei (China) | Semi-winter |
| Cy17Pxx-58    | Sichuan (China) | Semi-winter | Wh-63 | Hubei (China) | Semi-winter |
| Cy18Pxx-62    | Sichuan (China) | Semi-winter | Wh-83 | Hubei (China) | Semi-winter |
| Cy19Pxx-65    | Sichuan (China) | Semi-winter | Wh-85 | Hubei (China) | Semi-winter |
| Cy20Pxx-66    | Sichuan (China) | Semi-winter | Wh-88 | Hubei (China) | Semi-winter |
| Cy21Pxx-84    | Sichuan (China) | Semi-winter | Wh-95 | Hubei (China) | Semi-winter |

|             |                     |             |            |                   |             |
|-------------|---------------------|-------------|------------|-------------------|-------------|
| D2          | Danmark             | Spring      | Wu164      | Gansu (China)     | Spring      |
| Daichousen  | Japan               | Semi-winter | Wx1025     | Hunan (China)     | Semi-winter |
| De68-12     | Anhui (China)       | Semi-winter | Wx10296    | Hunan (China)     | Semi-winter |
| Enyou73-1-2 | Chongqing (China)   | Semi-winter | Wx10315    | Hunan (China)     | Semi-winter |
| Erake       | Poland              | Spring      | Wx10329    | Hunan (China)     | Semi-winter |
| Fengyou9    | Henan (China)       | Semi-winter | Xiangyou11 | Hunan (China)     | Semi-winter |
| FTD1        | Hubei (China)       | Semi-winter | Xiangyou13 | Hunan (China)     | Semi-winter |
| FTD2        | Hubei (China)       | Semi-winter | Xiangyou15 | Hunan (China)     | Semi-winter |
| FTD3        | Hubei (China)       | Semi-winter | Xiwang106  | Hubei (China)     | Semi-winter |
| FTD4        | Hubei (China)       | Semi-winter | Y1         | Shanghai (China)  | Semi-winter |
| FTD5        | Hubei (China)       | Semi-winter | Y14        | Jiangsu (China)   | Semi-winter |
| FTD6        | Hubei (China)       | Semi-winter | Y16        | Jiangsu (China)   | Semi-winter |
| FTD7        | Hubei (China)       | Semi-winter | Y2         | Shanghai (China)  | Semi-winter |
| FTD8        | Hubei (China)       | Semi-winter | Y3         | Shanghai (China)  | Semi-winter |
| Fuyou4      | Heilongjiang(China) | Spring      | Y32        | Jiangsu (China)   | Semi-winter |
| Ganyou5     | Hubei (China)       | Semi-winter | Y33        | Japan             | Semi-winter |
| Gl302-1     | Gansu (China)       | Spring      | Y38        | Anhui (China)     | Semi-winter |
| Guangde138  | Anhui (China)       | Semi-winter | Y4         | Shanghai (China)  | Semi-winter |
| Guangde761  | Anhui (China)       | Semi-winter | Y40        | Anhui (China)     | Semi-winter |
| Guangde8104 | Anhui (China)       | Semi-winter | Y44        | Anhui (China)     | Semi-winter |
| Gy270       | Shanxi (China)      | Semi-winter | Y46        | Anhui (China)     | Semi-winter |
| Gy282       | Shanxi (China)      | Semi-winter | Y6         | Shanghai (China)  | Semi-winter |
| H-6         | Japan               | Semi-winter | Y8         | Shanghai (China)  | Semi-winter |
| Hai-244     | Canada              | Spring      | Yan81-2    | Chongqing (China) | Semi-winter |



|              |                  |             |               |                  |             |
|--------------|------------------|-------------|---------------|------------------|-------------|
| He-426       | Hubei (China)    | Semi-winter | Yangguang198  | Hubei (China)    | Semi-winter |
| Hongyou3     | Jiangsu (China)  | Semi-winter | Yangguang2009 | Hubei (China)    | Semi-winter |
| Huahang901   | Hubei (China)    | Semi-winter | Yangguang209  | Hubei (China)    | Semi-winter |
| Huashuang128 | Hubei (China)    | Semi-winter | Yangj6711     | Jiangsu (China)  | Semi-winter |
| Huashuang2   | Hubei (China)    | Semi-winter | Yangyou4      | Jiangsu (China)  | Semi-winter |
| Huashuang4   | Hubei (China)    | Semi-winter | Yangyou5      | Jiangsu (China)  | Semi-winter |
| Huashuang5   | Hubei (China)    | Semi-winter | Yanyou2       | Jiangsu (China)  | Semi-winter |
| Huayou12     | Hubei (China)    | Semi-winter | Yb3           | Hunan (China)    | Semi-winter |
| Huayou13     | Hubei (China)    | Semi-winter | Youyan2       | Guizhou (China)  | Semi-winter |
| Huayou14     | Hubei (China)    | Semi-winter | Yuyou1        | Henan (China)    | Semi-winter |
| Huayou2      | Hubei (China)    | Semi-winter | Zaofeng1      | Zhejiang (China) | Semi-winter |
| Huayou3      | Hubei (China)    | Semi-winter | Zh-243        | Canada           | Spring      |
| Huayou4      | Hubei (China)    | Semi-winter | Zhen3736      | Jiangsu (China)  | Semi-winter |
| Huayou6      | Hubei (China)    | Semi-winter | Zhengyou3     | Jiangsu (China)  | Semi-winter |
| Huyou12      | Shanghai (China) | Semi-winter | Zhenyou5      | Jiangsu (China)  | Semi-winter |
| Huyou14      | Shanghai (China) | Semi-winter | Zhenyou6      | Jiangsu (China)  | Semi-winter |
| Huyou15      | Shanghai (China) | Semi-winter | Zheshuang3    | Zhejiang (China) | Semi-winter |
| Huyou17      | Shanghai (China) | Semi-winter | Zheshuang6    | Zhejiang (China) | Semi-winter |
| Huyou18      | Shanghai (China) | Semi-winter | Zheshuang72   | Zhejiang (China) | Semi-winter |
| Huyou19      | Shanghai (China) | Semi-winter | Zheshuang8    | Zhejiang (China) | Semi-winter |
| Huyou21      | Shanghai (China) | Semi-winter | Zheyou17      | Zhejiang (China) | Semi-winter |
| Huyou3       | Shanghai (China) | Semi-winter | Zheyou18      | Zhejiang (China) | Semi-winter |

|          |                   |             |               |                  |             |
|----------|-------------------|-------------|---------------|------------------|-------------|
| Imc103   | Chongqing (China) | Semi-winter | Zheyoun19     | Zhejiang (China) | Semi-winter |
| Jia904   | Hubei (China)     | Semi-winter | Zheyoun21     | Zhejiang (China) | Semi-winter |
| Jia908   | Hubei (China)     | Semi-winter | Zheyoun50     | Zhejiang (China) | Semi-winter |
| Jia915   | Hubei (China)     | Semi-winter | Zheyoun601    | Zhejiang (China) | Semi-winter |
| Jia917   | Hubei (China)     | Semi-winter | Zheyoun758    | Zhejiang (China) | Semi-winter |
| Jia922   | Hubei (China)     | Semi-winter | Zhongshuang10 | Hubei (China)    | Semi-winter |
| Jia923   | Hubei (China)     | Semi-winter | Zhongshuang11 | Hubei (China)    | Semi-winter |
| Jia931   | Hubei (China)     | Semi-winter | Zhongshuang12 | Hubei (China)    | Semi-winter |
| Jia951   | Hubei (China)     | Semi-winter | Zhongshuang2  | Hubei (China)    | Semi-winter |
| Jia963   | Hubei (China)     | Semi-winter | Zhongshuang3  | Hubei (China)    | Semi-winter |
| Jiapf190 | Hubei (China)     | Semi-winter | Zhongshuang4  | Hubei (China)    | Semi-winter |
| Jiayu05  | Hubei (China)     | Semi-winter | Zhongshuang6  | Hubei (China)    | Semi-winter |
| Jiayu16  | Hubei (China)     | Semi-winter | Zhongshuang7  | Hubei (China)    | Semi-winter |
| Jiayu17  | Hubei (China)     | Semi-winter | Zhongshuang9  | Hubei (China)    | Semi-winter |
| Jiayu25  | Hubei (China)     | Semi-winter | Zhongyou589   | Hubei (China)    | Semi-winter |
| Jiayu31  | Hubei (China)     | Semi-winter | Zhongyou821   | Hubei (China)    | Semi-winter |
| Jie65-1  | Zhejiang (China)  | Semi-winter | 509           | Hunan (China)    | Semi-winter |
| Kelina   | Chongqing (China) | Semi-winter | 563           | Hunan (China)    | Semi-winter |
| Kenc1    | Shanxi (China)    | Semi-winter | 631           | Hunan (China)    | Semi-winter |
| L134     | Hubei (China)     | Semi-winter | 699           | Hubei (China)    | Semi-winter |
| L135     | Hubei (China)     | Semi-winter | 782           | Hunan (China)    | Semi-winter |
| L136     | Hubei (China)     | Semi-winter | 783           | Hunan (China)    | Semi-winter |

|          |                  |             |       |                   |             |
|----------|------------------|-------------|-------|-------------------|-------------|
| L137     | Hubei (China)    | Semi-winter | 876   | Gansu (China)     | Winter      |
| L138     | Hubei (China)    | Semi-winter | 986   | Gansu (China)     | Winter      |
| L139     | Hubei (China)    | Semi-winter | 1111  | Hubei (China)     | Semi-winter |
| L140     | Hubei (China)    | Semi-winter | 1188  | Hubei (China)     | Semi-winter |
| L385     | Zhejiang (China) | Semi-winter | 1252  | Hunan (China)     | Semi-winter |
| L389     | Jiangsu (China)  | Semi-winter | 1281  | Hunan (China)     | Semi-winter |
| L392     | Shanghai (China) | Semi-winter | 1321  | Hunan (China)     | Semi-winter |
| L394     | Shanghai (China) | Semi-winter | 1322  | Hunan (China)     | Semi-winter |
| L395     | Shanghai (China) | Semi-winter | 1360  | Hunan (China)     | Semi-winter |
| L396     | Zhejiang (China) | Semi-winter | 1368  | Hunan (China)     | Semi-winter |
| L397     | Zhejiang (China) | Semi-winter | 1472  | Hunan (China)     | Semi-winter |
| L400     | Hubei (China)    | Semi-winter | 1570  | Hubei (China)     | Semi-winter |
| L401     | Hubei (China)    | Semi-winter | 2354  | Hubei (China)     | Semi-winter |
| L402     | Hubei (China)    | Semi-winter | 2359  | Hubei (China)     | Semi-winter |
| L407     | Hubei (China)    | Semi-winter | 2365  | Hubei (China)     | Semi-winter |
| L503     | Shanghai (China) | Semi-winter | 7016  | Hubei (China)     | Semi-winter |
| L508     | Jiangsu (China)  | Semi-winter | 7022  | Hubei (China)     | Semi-winter |
| Longyou2 | Gansu (China)    | Spring      | 7037  | Hubei (China)     | Semi-winter |
| Longyou4 | Gansu (China)    | Spring      | 7094  | Hubei (China)     | Semi-winter |
| Major    | France           | Winter      | 7189  | Hubei (China)     | Semi-winter |
| Monty    | Australia        | Spring_     | 7191  | Hubei (China)     | Semi-winter |
| Nakae    | Japan            | Spring      | 9852  | Gansu (China)     | Winter      |
| Chousen  |                  |             |       |                   |             |
| Nca      | Hubei (China)    | Semi-winter | 23651 | Hubei (China)     | Semi-winter |
| Niklas   | Denmark          | Spring      | 28887 | Chongqing (China) | Semi-winter |

|            |                   |             |        |                   |             |
|------------|-------------------|-------------|--------|-------------------|-------------|
| Ningyou 7  | Jiangsu (China)   | Semi-winter | 42645  | Hubei (China)     | Semi-winter |
| Ningyou1   | Jiangsu(China)    | Semi-winter | 42646  | Hubei (China)     | Semi-winter |
| Ningyou12  | Jiangsu (China)   | Semi-winter | 42666  | Hubei (China)     | Semi-winter |
| Ningyou18  | Jiangsu (China)   | Semi-winter | 42667  | Hubei (China)     | Semi-winter |
| Ningyou6   | Jiangsu (China)   | Semi-winter | 42668  | Hubei (China)     | Semi-winter |
| Ningyou8   | Jiangsu (China)   | Semi-winter | 42672  | Hubei (China)     | Semi-winter |
| Niuerduo   | Chongqing (China) | Semi-winter | 90750  | Chongqing (China) | Semi-winter |
| Norin42    | Japan             | Semi-winter | 93210  | Hubei (China)     | Semi-winter |
| Norin43    | Japan             | Semi-winter | 96021  | Hubei (China)     | Semi-winter |
| O-136      | Chongqing (China) | Semi-winter | 96063  | Hubei (China)     | Semi-winter |
| P113       | Shanxi (China)    | Semi-winter | 97096  | Hubei (China)     | Semi-winter |
| P18        | Hubei (China)     | Semi-winter | 97097  | Hubei (China)     | Semi-winter |
| P310       | Shanxi (China)    | Semi-winter | 97177  | Hubei (China)     | Semi-winter |
| P668       | Shanxi (China)    | Semi-winter | 880101 | Chongqing (China) | Semi-winter |
| P685       | Shanxi (China)    | Semi-winter | 03I32B | Gansu (China)     | Spring      |
| Peixuan170 | Jiangsu (China)   | Semi-winter | 03II3B | Gansu (China)     | Spring      |
| Q-247      | the USA           | Spring      | 03II4B | Gansu (China)     | Spring      |
| Qianyou331 | Guizhou (China)   | Semi-winter | 03Lf1  | Gansu (China)     | Spring      |
| Qianyou4   | Guizhou (China)   | Semi-winter | 06H7   | Gansu (China)     | Spring      |
| Qing662    | Hubei (China)     | Semi-winter | 06T9F  | Gansu (China)     | Spring      |
| Qinyou1    | Shanxi (China)    | Semi-winter | 08-P35 | Hubei (China)     | Semi-winter |
| Qinyou5    | Shanxi (China)    | Semi-winter | 08-P36 | Hubei (China)     | Semi-winter |

|               |                   |             |          |                 |             |
|---------------|-------------------|-------------|----------|-----------------|-------------|
| R2            | Hubei (China)     | Semi-winter | 09-P36   | Hubei (China)   | Semi-winter |
| Rq011         | Australia         | Spring      | 09-P37   | Hubei (China)   | Semi-winter |
| Rr002         | Australia         | Spring      | 10-1043  | Hunan (China)   | Semi-winter |
| Rr009         | Australia         | Spring      | 10-1047  | Hunan (China)   | Semi-winter |
| Rucabo        | German            | Spring      | 10-1061  | Hunan (China)   | Semi-winter |
| Santana       | German            | Winter      | 10-1070  | Hunan (China)   | Semi-winter |
| Shan2B        | Shanxi (China)    | Semi-winter | 10-1230  | Qinghai (China) | Spring      |
| Shengguang77  | Hubei (China)     | Semi-winter | 10-1358  | Hunan (China)   | Semi-winter |
| Shengliyoucai | Japan             | Semi-winter | 10-32    | Hubei (China)   | Semi-winter |
| Shenhuang1    | Shanghai (China)  | Semi-winter | 10-33    | Hubei (China)   | Semi-winter |
| Shilifeng     | Jiangsu (China)   | Semi-winter | 10-34    | Hubei (China)   | Semi-winter |
| Shilijia      | Jiangsu (China)   | Semi-winter | 10-758   | Qinghai (China) | Spring      |
| Si-242        | Canada            | Spring      | 10-804   | Hunan (China)   | Semi-winter |
| Sophia        | unknown           | Spring      | 10-P10   | Hubei (China)   | Semi-winter |
| Suyou1        | Jiangsu (China)   | Semi-winter | 10-P29   | Hubei (China)   | Semi-winter |
| Suyou4        | Jiangsu (China)   | Semi-winter | 11-1184  | Qinghai (China) | Spring      |
| Swu01         | Hubei (China)     | Semi-winter | 11-504   | Qinghai (China) | Spring      |
| Swu100        | Chongqing (China) | Semi-winter | 11-540   | Qinghai (China) | Spring      |
| Swu102        | Chongqing (China) | Semi-winter | 11-7-103 | Hubei (China)   | Semi-winter |
| Swu103        | Chongqing (China) | Semi-winter | 11-7-117 | Hubei (China)   | Semi-winter |
| Swu104        | Chongqing (China) | Semi-winter | 11-7-125 | Hubei (China)   | Semi-winter |
| Swu106        | Chongqing (China) | Semi-winter | 11-9-700 | Hubei (China)   | Semi-winter |
| Swu110        | Chongqing (China) | Semi-winter | 11-9-701 | Hubei (China)   | Semi-winter |
| Swu111        | Chongqing (China) | Semi-winter | 11-9-703 | Hubei (China)   | Semi-winter |
| Swu113        | Chongqing (China) | Semi-winter | 11-9-704 | Hubei (China)   | Semi-winter |

|        |                   |             |            |                 |             |
|--------|-------------------|-------------|------------|-----------------|-------------|
| Swu114 | Chongqing (China) | Semi-winter | 11-9-705   | Hubei (China)   | Semi-winter |
| Swu39  | Sichuan (China)   | Semi-winter | 11-9-706   | Hubei (China)   | Semi-winter |
| Swu40  | Chongqing (China) | Semi-winter | 11-9-707   | Hubei (China)   | Semi-winter |
| Swu41  | Chongqing (China) | Semi-winter | 11-997     | Qinghai (China) | Spring      |
| Swu42  | Chongqing (China) | Semi-winter | 11-P30     | Hubei (China)   | Semi-winter |
| Swu43  | Chongqing (China) | Semi-winter | 11-P63-5   | Hubei (China)   | Semi-winter |
| Swu44  | Chongqing (China) | Semi-winter | 11-P63-8   | Hubei (China)   | Semi-winter |
| Swu45  | Chongqing (China) | Semi-winter | 11-P67     | Hubei (China)   | Semi-winter |
| Swu46  | Chongqing (China) | Semi-winter | 11-P74-13  | Hubei (China)   | Semi-winter |
| Swu47  | Chongqing (China) | Semi-winter | 11-P74-8   | Hubei (China)   | Semi-winter |
| Swu48  | Chongqing (China) | Semi-winter | 12-P24     | Hubei (China)   | Semi-winter |
| Swu49  | Chongqing (China) | Semi-winter | 12-P25     | Hubei (China)   | Semi-winter |
| Swu52  | Chongqing (China) | Semi-winter | 2011-6200  | Hubei (China)   | Semi-winter |
| Swu53  | Chongqing (China) | Semi-winter | 2011-6308  | Hubei (China)   | Semi-winter |
| Swu54  | Chongqing (China) | Semi-winter | 2011-7103  | Hubei (China)   | Semi-winter |
| Swu56  | Chongqing (China) | Semi-winter | 2012-11526 | Hubei (China)   | Semi-winter |
| Swu57  | Chongqing (China) | Semi-winter | 2012-3448  | Hubei (China)   | Semi-winter |
| Swu59  | Chongqing (China) | Semi-winter | 2012-3546  | Hubei (China)   | Semi-winter |
| Swu60  | Chongqing (China) | Semi-winter | 2012-4531  | Hubei (China)   | Semi-winter |
| Swu61  | Chongqing (China) | Semi-winter | 2012-5086  | Hubei (China)   | Semi-winter |
| Swu63  | Chongqing (China) | Semi-winter | 2012-5113  | Hubei (China)   | Semi-winter |
| Swu65  | Chongqing (China) | Semi-winter | 2012-8327  | Hubei (China)   | Semi-winter |

|       |                   |             |            |                 |             |
|-------|-------------------|-------------|------------|-----------------|-------------|
| Swu66 | Chongqing (China) | Semi-winter | 2012-8355  | Hubei (China)   | Semi-winter |
| Swu68 | Chongqing (China) | Semi-winter | 2012-8380  | Hubei (China)   | Semi-winter |
| Swu69 | Chongqing (China) | Semi-winter | 2012-8998  | Hubei (China)   | Semi-winter |
| Swu70 | Chongqing (China) | Semi-winter | 2012-9323  | Hubei (China)   | Semi-winter |
| Swu74 | Chongqing (China) | Semi-winter | 2012-9354  | Hubei (China)   | Semi-winter |
| Swu75 | Chongqing (China) | Semi-winter | 2012-9380  | Hubei (China)   | Semi-winter |
| Swu76 | Chongqing (China) | Semi-winter | 2012-9478  | Hubei (China)   | Semi-winter |
| Swu77 | Chongqing (China) | Semi-winter | 2012-9542  | Hubei (China)   | Semi-winter |
| Swu80 | Chongqing (China) | Semi-winter | 2012-K8053 | Hubei (China)   | Semi-winter |
| Swu81 | Chongqing (China) | Semi-winter | 7-7766-74  | Hubei (China)   | Semi-winter |
| SWU82 | Chongqing (China) | Semi-winter | 96—203     | Qinghai (China) | Semi-winter |
| Swu84 | Chongqing (China) | Semi-winter | 9Bao22     | Hubei (China)   | Semi-winter |
| Swu85 | Chongqing (China) | Semi-winter | 9F087      | Hubei (China)   | Semi-winter |

---
